# Supplementary material for: Relationship between food waste, diet quality, and environmental sustainability
Source: PLoS One. 2018 Apr 18;13(4):e0195405. doi: 10.1371/journal.pone.0195405 (PMC5905889; doi:10.1371/journal.pone.0195405)
Supplement: S1 Table — (XLSX) [file pone.0195405.s002.xlsx]

## Sheet: S1 Table
S1 Table: Dataset linkage for the Loss-adjusted Food Availability data series and Food Commodity Intake Database
LAFA description		FCID code		FCID description		Match1
rye flour		1500329000		Rye, flour		1
canned apple and applesauce		1100011001		Apple, sauce-babyfood		1
pork		3400290000		Pork, meat		1
cane and beet sugar		9500362001		Sugarcane, sugar-babyfood		1
grape juice		1304176001		Grape, juice-babyfood		1
canned apple and applesauce		1100011000		Apple, sauce		1
corn starch		1500123001		Corn, field, starch-babyfood		1
dried plum		1203286001		Plum, prune, fresh-babyfood		1
apple juice		1100010000		Apple, juice		1
dried plum		1203286000		Plum, prune, fresh		1
mature pea and lentil		603203000		Lentil, seed		1
dry pear		1100267000		Pear, dried		1
turkey		5000382001		Turkey, meat-babyfood		1
black bean		603030000		Bean, black, seed		1
great northern bean		603035000		Bean, great northern, seed		1
dried onion		301238000		Onion, bulb, dried		1
prune juice		1203288001		Plum, prune, juice-babyfood		1
beef		3100044000		Beef, meat		1
honey		9500186001		Honey-babyfood		1
edible beef tallow		3100047000		Beef, fat		1
navy bean		603040000		Bean, navy, seed		1
dry peach		1202261000		Peach, dried		1
grapefruit juice		1003181000		Grapefruit, juice		1
egg		7000147001		Egg, yolk-babyfood		1
cranberry juice		1307132001		Cranberry, juice-babyfood		1
cranberry juice		1307132000		Cranberry, juice		1
dry fig		2302154000		Fig, dried		1
lemon juice		1002200000		Lemon, juice		1
potato chip		103296000		Potato, chips		1
egg		7000146000		Egg, white		1
chicken		4000093001		Chicken, meat-babyfood		1
egg		7000147000		Egg, yolk		1
macadamia nut		1400213000		Macadamia nut		1
corn flour and meal		1500120000		Corn, field, flour		1
orange juice		1001241000		Orange, juice		1
rye flour		1500328000		Rye, grain		1
dried plum		1203287000		Plum, prune, dried		1
salad and cooking oil		1500125000		Corn, field, oil		1
honey		9500186000		Honey		1
lemon juice		1002200001		Lemon, juice-babyfood		1
white, whole wheat, and durum flour		1500401000		Wheat, grain		1
high fructose corn sweetener		1500124000		Corn, field, syrup		1
beef		3100044001		Beef, meat-babyfood		1
pineapple juice		2403281001		Pineapple, juice-babyfood		1
grape juice		1304176000		Grape, juice		1
dried potato		103298001		Potato, flour-babyfood		1
dried potato		103298000		Potato, flour		1
lime juice		1002207000		Lime, juice		1
cane and beet sugar		101052000		Beet, sugar		1
hazelnut		1400155000		Hazelnut		1
peanut		9500263000		Peanut		1
apple juice		1100010001		Apple, juice-babyfood		1
cane and beet sugar		101052001		Beet, sugar-babyfood		1
white, whole wheat, and durum flour		1500401001		Wheat, grain-babyfood		1
corn flour and meal		1500120001		Corn, field, flour-babyfood		1
white, whole wheat, and durum flour		1500402001		Wheat, flour-babyfood		1
corn starch		1500123000		Corn, field, starch		1
dried potato		103297001		Potato, dry (granules/ flakes)-babyfood		1
pork		3400290001		Pork, meat-babyfood		1
almond		1400003000		Almond		1
white, whole wheat, and durum flour		1500404000		Wheat, bran		1
dried potato		103297000		Potato, dry (granules/ flakes)		1
turkey		5000382000		Turkey, meat		1
mature lima bean		603038000		Bean, lima, seed		1
raisin		1304178000		Grape, raisin		1
lard		3400293001		Pork, fat-babyfood		1
dried date		2303141000		Date		1
orange juice		1001241001		Orange, juice-babyfood		1
cane and beet sugar		9500362000		Sugarcane, sugar		1
edible syrup		1500345000		Sorghum, syrup		1
lard		3400293000		Pork, fat		1
dried apple		1100009000		Apple, dried		1
egg		7000145000		Egg, whole		1
prune juice		1203288000		Plum, prune, juice		1
dried apricot		1202013000		Apricot, dried		1
white, whole wheat, and durum flour		1500402000		Wheat, flour		1
pinto bean		603042000		Bean, pinto, seed		1
edible beef tallow		3100047001		Beef, fat-babyfood		1
chicken		4000093000		Chicken, meat		1
pineapple juice		2403281000		Pineapple, juice		1
pistachio		1400282000		Pistachio		1
dried onion		301238001		Onion, bulb, dried-babyfood		1
peanut		9500264000		Peanut, butter		1
high fructose corn sweetener		1500124001		Corn, field, syrup-babyfood		1
red kidney bean		603036000		Bean, kidney, seed		1
pecan		1400269000		Pecan		1
walnut		1400391000		Walnut		1
white, whole wheat, and durum flour		1500403000		Wheat, germ		1
lime juice		1002207001		Lime, juice-babyfood		1
dried apple		1100009001		Apple, dried-babyfood		1
corn flour and meal		1500121000		Corn, field, meal		1
egg		7000145001		Egg, whole-babyfood		1
barley		1500025001		Barley, pearled barley-babyfood		2
other mature bean		602031000		Bean, broad, succulent		2
fresh banana		2402023001		Banana-babyfood		2
fresh mango		2402215001		Mango-babyfood		2
chicken		4000097000		Chicken, skin		2
oats		1500233001		Oat, groats/rolled oats-babyfood		2
rice		1500326001		Rice, bran-babyfood		2
fresh strawberry		1307359001		Strawberry-babyfood		2
oats		1500232001		Oat, flour-babyfood		2
lamb		3500343000		Sheep, liver		2
rice		1500405000		Wild rice		2
fresh blueberry		1302057000		Blueberry		2
fresh endive		401150000		Endive		2
other mature bean		603098001		Chickpea, seed-babyfood		2
fresh lemon		1002199000		Lemon		2
cane and beet sugar		101053000		Beet, sugar, molasses		2
fresh apple		1100008001		Apple, peeled fruit-babyfood		2
chicken		6000304000		Poultry, other, fat		2
fresh squash		902356000		Squash, summer		2
other oil		2003128001		Cottonseed, oil-babyfood		2
beef		3100046001		Beef, meat byproducts-babyfood		2
fresh kale		402194000		Kale		2
rice		1500323000		Rice, white		2
fresh onion		301237001		Onion, bulb-babyfood		2
mature pea and lentil		603256001		Pea, dry-babyfood		2
turkey		5000384001		Turkey, meat byproducts-babyfood		2
other mature bean		603032000		Bean, broad, seed		2
turkey		5000385000		Turkey, fat		2
other mature bean		603039000		Bean, mung, seed		2
fresh pineapple		2403280000		Pineapple, dried		2
mature pea and lentil		603256000		Pea, dry		2
lamb		3500341000		Sheep, fat		2
fresh okra		802234000		Okra		2
fresh snap bean		601043000		Bean, snap, succulent		2
fresh squash		902357001		Squash, winter-babyfood		2
other mature bean		600347000		Soybean, seed		2
frozen blackberry		1301055000		Blackberry		2
coconut		1400112000		Coconut, dried		2
fresh potato		103299000		Potato, tuber, w/peel		2
barley		1500026001		Barley, flour-babyfood		2
other tree nut		1400068000		Butternut		2
other oil		2002365000		Sunflower, oil		2
lamb		3500342000		Sheep, kidney		2
fresh bell pepper		802270000		Pepper, bell		2
turkey		5000385001		Turkey, fat-babyfood		2
fresh tomato		801375000		Tomato		2
other oil		2003128000		Cottonseed, oil		2
fresh celery		2202085000		Celery		2
lamb		3500341001		Sheep, fat-babyfood		2
fresh garlic		301165000		Garlic, bulb		2
beef		3100045000		Beef, meat, dried		2
fresh apple		1100007000		Apple, fruit with peel		2
fresh grape		1304175000		Grape		2
fresh artichoke		9500016000		Artichoke, globe		2
canned tuna		8000159000		Fish-saltwater finfish, tuna		2
other mature bean		9500109000		Cocoa bean, chocolate		2
fresh banana		2402024001		Banana, dried-babyfood		2
fresh tomato		801375001		Tomato-babyfood		2
other oil		2002330000		Safflower, oil		2
chicken		4000097001		Chicken, skin-babyfood		2
fresh cherry		1201090000		Cherry		2
other oil		2001319000		Rapeseed, oil		2
fresh cranberry		1307130000		Cranberry		2
corn flour and meal		1500122000		Corn, field, bran		2
other oil		2002365001		Sunflower, oil-babyfood		2
fresh cranberry		1307130001		Cranberry-babyfood		2
fresh plum		1203285000		Plum		2
oats		1500232000		Oat, flour		2
fresh cauliflower		500083000		Cauliflower		2
rice		1500324000		Rice, brown		2
fresh watermelon		901399000		Watermelon		2
other tree nut		1400092000		Chestnut		2
canned tomato		801377000		Tomato, puree		2
fresh orange		1001242000		Orange, peel		2
fresh papaya		2402245000		Papaya		2
lamb		3500339001		Sheep, meat-babyfood		2
fresh apricot		1202012000		Apricot		2
fresh pear		1100266001		Pear-babyfood		2
turkey		5000386001		Turkey, skin-babyfood		2
fresh pineapple		2403279000		Pineapple		2
beef		3100049000		Beef, liver		2
fresh plum		1203285001		Plum-babyfood		2
fresh lemon		1002201000		Lemon, peel		2
fresh raspberry		1301320001		Raspberry-babyfood		2
other tree nut		1400081000		Cashew		2
fresh and frozen fish		8000157000		Fish-freshwater finfish		2
fresh leaf lettuce		401205000		Lettuce, leaf		2
fresh bell pepper		802271000		Pepper, bell, dried		2
fresh broccoli		500061001		Broccoli-babyfood		2
fresh pineapple		2403279001		Pineapple-babyfood		2
other oil		9500244001		Palm, oil-babyfood		2
fresh cherry		1201090001		Cherry-babyfood		2
fresh mustard green		402229000		Mustard greens		2
chicken		6000305000		Poultry, other, skin		2
fresh collard green		402117000		Collards		2
fresh sweet corn		1500127000		Corn, sweet		2
chicken		6000301000		Poultry, other, meat		2
other oil		1400114000		Coconut, oil		2
other oil		1400114001		Coconut, oil-babyfood		2
fresh celery		2202085001		Celery-babyfood		2
fresh pumpkin		902308000		Pumpkin		2
frozen green pea		602255000		Pea, succulent		2
salad and cooking oil		2301236000		Olive, oil		2
fresh apricot		1202012001		Apricot-babyfood		2
fresh snap bean		601043001		Bean, snap, succulent-babyfood		2
oats		1500233000		Oat, groats/rolled oats		2
barley		1500027000		Barley, bran		2
fresh sweet potato		103407000		Yam bean		2
fresh and frozen shellfish		8000162000		Fish-shellfish, mollusc		2
other mature bean		603041000		Bean, pink, seed		2
fresh carrot		101078001		Carrot-babyfood		2
other oil		9500244000		Palm, oil		2
other oil		2002330001		Safflower, oil-babyfood		2
fresh tomato		801378001		Tomato, dried-babyfood		2
other mature bean		600349000		Soybean, soy milk		2
fresh grapefruit		1003180000		Grapefruit		2
canned tomato		801377001		Tomato, puree-babyfood		2
fresh peach		1202260001		Peach-babyfood		2
fresh sweet potato		103406000		Yam, true		2
fresh blueberry		1302057001		Blueberry-babyfood		2
turkey		5000384000		Turkey, meat byproducts		2
salad and cooking oil		9500265000		Peanut, oil		2
salad and cooking oil		1500125001		Corn, field, oil-babyfood		2
fresh mango		2402216000		Mango, dried		2
other oil		1400004000		Almond, oil		2
fresh and frozen fish		8000158000		Fish-freshwater finfish, farm raised		2
barley		1500026000		Barley, flour		2
rice		1500325001		Rice, flour-babyfood		2
fresh pumpkin		902309000		Pumpkin, seed		2
fresh sweet potato		103366000		Sweet potato		2
fresh honeydew		901187000		Honeydew melon		2
other oil		2001337000		Sesame, oil		2
other mature bean		603182000		Guar, seed		2
frozen green pea		601257000		Pea, edible podded, succulent		2
fresh kiwi		1304195000		Kiwifruit, fuzzy		2
other tree nut		1400059000		Brazil nut		2
other mature bean		9500110000		Cocoa bean, powder		2
fresh papaya		2402246000		Papaya, dried		2
fresh apple		1100008000		Apple, peeled fruit		2
canned tomato		801376000		Tomato, paste		2
lamb		3500340000		Sheep, meat byproducts		2
fresh carrot		101079000		Carrot, juice		2
fresh squash		902356001		Squash, summer-babyfood		2
other oil		2001163000		Flax seed, oil		2
salad and cooking oil		600350000		Soybean, oil		2
fresh strawberry		1307359000		Strawberry		2
salad and cooking oil		600350001		Soybean, oil-babyfood		2
edible syrup		9500219000		Maple syrup		2
fresh bell pepper		802271001		Pepper, bell, dried-babyfood		2
chicken		4000095001		Chicken, meat byproducts-babyfood		2
fresh cantaloupe		901075000		Cantaloupe		2
other oil		9500276000		Peppermint, oil		2
canned olive		2301235000		Olive		2
fresh eggplant		802148000		Eggplant		2
fresh squash		902357000		Squash, winter		2
rice		1500325000		Rice, flour		2
fresh potato		103300000		Potato, tuber, w/o peel		2
cane and beet sugar		9500363000		Sugarcane, molasses		2
fresh broccoli		500061000		Broccoli		2
fresh pear		1100266000		Pear		2
coconut		1400111001		Coconut, meat-babyfood		2
oats		1500231000		Oat, bran		2
fresh spinach		401355000		Spinach		2
fresh asparagus		2201019000		Asparagus		2
chicken		6000303000		Poultry, other, meat byproducts		2
fresh mushroom		2100228000		Mushroom		2
turkey		5000386000		Turkey, skin		2
fresh and frozen shellfish		8000161000		Fish-shellfish, crustacean		2
other oil		2001319001		Rapeseed, oil-babyfood		2
turkey		5000383000		Turkey, liver		2
mature lima bean		602037000		Bean, lima, succulent		2
pork		3400292000		Pork, meat byproducts		2
pork		3400295000		Pork, liver		2
rice		1500323001		Rice, white-babyfood		2
pork		3400294000		Pork, kidney		2
fresh potato		103300001		Potato, tuber, w/o peel-babyfood		2
fresh tangerine		1001369000		Tangerine		2
fresh cucumber		902135000		Cucumber		2
fresh tomato		801378000		Tomato, dried		2
canned tomato		801376001		Tomato, paste-babyfood		2
chicken		4000096000		Chicken, fat		2
coconut		1400113000		Coconut, milk		2
fresh raspberry		1301320000		Raspberry		2
other mature bean		600348000		Soybean, flour		2
other mature bean		600348001		Soybean, flour-babyfood		2
fresh orange		1001240000		Orange		2
fresh garlic		301165001		Garlic, bulb-babyfood		2
dry fig		2302153000		Fig		2
fresh radish		101314000		Radish, roots		2
fresh sweet corn		1500127001		Corn, sweet-babyfood		2
coconut		1400111000		Coconut, meat		2
chicken		4000094000		Chicken, liver		2
fresh brussels sprout		500064000		Brussels sprouts		2
lamb		3500339000		Sheep, meat		2
cane and beet sugar		101053001		Beet, sugar, molasses-babyfood		2
fresh and frozen fish		8000160000		Fish-saltwater finfish, other		2
other mature bean		603098000		Chickpea, seed		2
chicken		6000302000		Poultry, other, liver		2
barley		1500025000		Barley, pearled barley		2
beef		3100046000		Beef, meat byproducts		2
fresh peach		1202260000		Peach		2
mature pea and lentil		602259000		Pea, pigeon, succulent		2
mature pea and lentil		603258000		Pea, pigeon, seed		2
other mature bean		603034000		Bean, cowpea, seed		2
fresh lime		1002206000		Lime		2
rice		1500326000		Rice, bran		2
pork		3400291000		Pork, skin		2
frozen green pea		602255001		Pea, succulent-babyfood		2
fresh head lettuce		401204000		Lettuce, head		2
pork		3400292001		Pork, meat byproducts-babyfood		2
chicken		4000095000		Chicken, meat byproducts		2
fresh avocado		2402020000		Avocado		2
fresh mango		2402215000		Mango		2
fresh carrot		101078000		Carrot		2
beef		3100048000		Beef, kidney		2
other mature bean		602033000		Bean, cowpea, succulent		2
chicken		4000096001		Chicken, fat-babyfood		2
fresh sweet potato		103366001		Sweet potato-babyfood		2
fresh banana		2402023000		Banana		2
rice		1500324001		Rice, brown-babyfood		2
other tree nut		1400278000		Pine nut		2
fresh banana		2402024000		Banana, dried		2
fresh turnip green		402389000		Turnip, greens		2
cane and beet sugar		9500363001		Sugarcane, molasses-babyfood		2
fresh spinach		401355001		Spinach-babyfood		2
fresh cabbage		500069000		Cabbage		2
fresh onion		301237000		Onion, bulb		2
beef		3100049001		Beef, liver-babyfood		2
fresh radish		103082001		Cassava-babyfood		3
fresh cabbage		500071000		Cabbage, Chinese, napa		3
fresh collard green		9500177000		Grape, leaves		3
fresh radish		101050001		Beet, garden, roots-babyfood		3
fresh apricot		1202014000		Apricot, juice		3
fresh strawberry		1307360000		Strawberry, juice		3
fresh turnip green		1901334000		Savory		3
nonfat dry milk		3600223001		Milk, nonfat solids-baby food/infant formula		3
fresh turnip green		9500188000		Hop		3
barley		2001162900		Flax, seed		3
fresh pear		1100268001		Pear, juice-babyfood		3
fresh turnip green		1901249000		Parsley, dried leaves		3
fresh turnip green		1901184001		Herbs, other-babyfood		3
fresh turnip green		401005000		Amaranth, leafy		3
fresh pear		1100310000		Quince		3
fresh papaya		2402247000		Papaya, juice		3
fresh radish		101316000		Radish, Oriental, roots		3
fresh radish		101084000		Celeriac		3
fresh turnip green		401138000		Dandelion, leaves		3
grape juice		1304179000		Grape, wine and sherry		3
fresh cranberry		1302174000		Gooseberry		3
white, whole wheat, and durum flour		1500226000		Millet, grain		3
fresh banana		2402284000		Plantain, dried		3
fresh plum		2402277000		Persimmon		3
fresh radish		103166000		Ginger		3
fresh tomato		801374000		Tomatillo		3
fresh pear		902021000		Balsam pear		3
fresh apple		2403346000		Soursop		3
heavy cream		3600222000		Milk, fat		3
fresh collard green		2201243000		Palm heart, leaves		3
fresh radish		101251001		Parsnip-babyfood		3
fresh celery		2202322000		Rhubarb		3
mature pea and lentil		2302077000		Carob		3
fresh turnip green		1901184000		Herbs, other		3
fresh cranberry		2401211000		Lychee		3
fresh collard green		401367000		Swiss chard		3
fresh lemon		1001106000		Citron		3
fresh leaf lettuce		402018000		Arugula		3
heavy cream		3600222001		Milk, fat-baby food/infant formula		3
fresh turnip green		401118000		Cilantro, leaves		3
barley		1500065000		Buckwheat		3
fresh onion		301338000		Shallot, bulb		3
fresh mango		2402217000		Mango, juice		3
fresh mango		2402217001		Mango, juice-babyfood		3
fresh radish		101100000		Chicory, roots		3
fresh radish		101168000		Ginseng, dried		3
fresh turnip green		1901220001		Marjoram-babyfood		3
fresh turnip green		402398000		Watercress		3
fresh radish		101067000		Burdock		3
fresh squash		902102000		Chinese waxgourd		3
fresh apricot		1202014001		Apricot, juice-babyfood		3
fresh radish		101327000		Rutabaga		3
fresh radish		101388000		Turnip, roots		3
fresh leaf lettuce		200140000		Dasheen, leaves		3
fresh cranberry		1302137000		Currant, dried		3
fresh cranberry		1302136000		Currant		3
fresh turnip green		200101000		Chicory, tops		3
fresh radish		2201196000		Kohlrabi		3
fresh watermelon		901400000		Watermelon, juice		3
fresh raspberry		1301321001		Raspberry, juice-babyfood		3
fresh papaya		2302183000		Guava		3
fresh radish		101050000		Beet, garden, roots		3
fresh tangerine		1001370000		Tangerine, juice		3
fresh turnip green		1901028000		Basil, fresh leaves		3
frozen blackberry		1301058000		Boysenberry		3
fresh strawberry		1307360001		Strawberry, juice-babyfood		3
fresh onion		302239000		Onion, green		3
fresh collard green		103371000		Tanier, corm		3
fresh turnip green		1901029001		Basil, dried leaves-babyfood		3
fresh onion		302103000		Chive, fresh leaves		3
fresh orange		1002197000		Kumquat		3
fresh celery		2202086000		Celery, juice		3
fresh cherry		1201091000		Cherry, juice		3
fresh tomato		801379000		Tomato, juice		3
fresh turnip green		1901249001		Parsley, dried leaves-babyfood		3
fresh turnip green		401144000		Dillweed		3
fresh radish		103167000		Ginger, dried		3
fresh turnip green		200051000		Beet, garden, tops		3
fresh radish		103139000		Dasheen, corm		3
beef		3900312000		Rabbit, meat		3
fresh turnip green		401248000		Parsley, leaves		3
fresh turnip green		402133000		Cress, garden		3
dry fig		2403060000		Breadfruit		3
fresh broccoli		402062000		Broccoli, Chinese		3
fresh radish		103017000		Artichoke, Jerusalem		3
white, whole wheat, and durum flour		1500381000		Triticale, flour		3
fresh peach		1202262001		Peach, juice-babyfood		3
fresh banana		2402283000		Plantain		3
fresh cranberry		1307131000		Cranberry, dried		3
fresh cabbage		401313000		Radicchio		3
fresh sweet corn		1500126000		Corn, pop		3
edible beef tallow		3200171000		Goat, fat		3
beef		3800221000		Meat, game		3
frozen blackberry		1301056000		Blackberry, juice		3
fresh turnip green		1901029000		Basil, dried leaves		3
fresh pear		1100268000		Pear, juice		3
fresh radish		101190000		Horseradish		3
fresh radish		103387000		Turmeric		3
fresh turnip green		401104000		Chrysanthemum, garland		3
fresh strawberry		2302358000		Starfruit		3
fresh cherry		1201091001		Cherry, juice-babyfood		3
white, whole wheat, and durum flour		9500006000		Amaranth, grain		3
fresh radish		101251000		Parsnip		3
fresh peach		1202262000		Peach, juice		3
fresh peach		1202230000		Nectarine		3
frozen blackberry		1301056001		Blackberry, juice-babyfood		3
fresh onion		302198000		Leek		3
beef		3200169000		Goat, meat		3
nonfat dry milk		3600223000		Milk, nonfat solids		3
mature pea and lentil		2302368000		Tamarind		3
fresh endive		9500054000		Belgium endive		3
skim milk		3600224000		Milk, water		3
fresh onion		2201152000		Fennel, Florence		3
skim milk		3600224001		Milk, water-babyfood/infant formula		3
fresh cabbage		500072000		Cabbage, Chinese, mustard		3
fresh radish		103082000		Cassava		3
fresh lime		2401351000		Spanish lime		3
beef		3200170000		Goat, meat byproducts		3
fresh turnip green		1901220000		Marjoram		3
fresh raspberry		1301321000		Raspberry, juice		3
fresh lemon		1001107000		Citrus hybrids		3
fresh cabbage		402070000		Cabbage, Chinese, bok choy		3
fresh apple		2403361000		Sugar apple		3
frozen blackberry		1303227000		Mulberry		3
fresh cranberry		1302191000		Huckleberry		3
NA		1902119000		Coriander, seed		4
NA		9500335001		Seaweed-babyfood		4
NA		2402290000		Pomegranate, juice		4
NA		1902105000		Cinnamon		4
NA		9500373000		Tea, instant		4
NA		802273000		Pepper, nonbell, dried		4
NA		2002364000		Sunflower, seed		4
NA		1800002000		Alfalfa, seed		4
NA		1902143000		Dill, seed		4
NA		103015000		Arrowroot, flour		4
NA		9500397000		Water chestnut		4
NA		902088000		Chayote, fruit		4
NA		1902354000		Spices, other		4
NA		1902354001		Spices, other-babyfood		4
NA		9500115000		Coffee, roasted bean		4
NA		2405252000		Passionfruit		4
NA		3600225001		Milk, sugar (lactose)-baby food/infant formula		4
NA		2402289000		Pomegranate		4
NA		9500186100		Bee pollen		4
NA		9500335000		Seaweed		4
NA		3700222501		Milk, human		4
NA		2201073000		Cactus		4
NA		9500275000		Peppermint		4
NA		2001336000		Sesame, seed		4
NA		2405253000		Passionfruit, juice		4
NA		8602000000		Water, indirect, all sources		4
NA		1902105001		Cinnamon-babyfood		4
NA		8601100000		Water, direct, tap		4
NA		9500306000		Psyllium, seed		4
NA		9500218000		Maple, sugar		4
NA		1902274001		Pepper, black and white-babyfood		4
NA		8601200000		Water, direct, bottled		4
NA		802272001		Pepper, nonbell-babyfood		4
NA		9500390000		Vinegar		4
NA		1902274000		Pepper, black and white		4
NA		9500116000		Coffee, instant		4
NA		802272000		Pepper, nonbell		4
NA		2201022000		Bamboo, shoots		4
NA		9500372000		Tea, dried		4
LAFA, Loss-adjusted Food Availability data series
FCID, Food Commodity Intake Database
NA, not applicable
1Where 1=direct match (cases in which there is no ambiguity about the match, e.g., "apple juice" listed in FCID and LAFA); 2=assumed match (cases in which there is some ambiguity about the match, e.g., "chicken"="chicken liver"); 3=proxy match (cases in which a direct or assumed match was not possible, but a reasonable proxy could be used, e.g., "barley"="buckwheat"; 4=match not possible.

## Sheet: _xltb_storage_
XL Toolbox Settings
	export_preset	<?xml version="1.0" encoding="utf-16"?>_x000D_ <Preset xmlns:xsd="http://www.w3.org/2001/XMLSchema" xmlns:xsi="http://www.w3.org/2001/XMLSchema-instance">_x000D_ <Name>Tiff, 300 dpi, RGB, Transparent canvas</Name>_x000D_ <Dpi>300</Dpi>_x000D_ <FileType>Png</FileType>_x000D_ <ColorSpace>Rgb</ColorSpace>_x000D_ <Transparency>TransparentCanvas</Transparency>_x000D_ <UseColorProfile>false</UseColorPr…
	export_path	C:\Users\zach.conrad\Documents\Projects\Food Waste\Submission\PLOS One\Submission 2\S1 Fig.tif
