# Supplementary material for: Relationship between food waste, diet quality, and environmental sustainability
Source: PLoS One. 2018 Apr 18;13(4):e0195405. doi: 10.1371/journal.pone.0195405 (PMC5905889; doi:10.1371/journal.pone.0195405)
Supplement: S2 Table — (XLSX) [file pone.0195405.s003.xlsx]

## Sheet: _xltb_storage_
XL Toolbox Settings
	export_preset	<?xml version="1.0" encoding="utf-16"?>_x000D_ <Preset xmlns:xsd="http://www.w3.org/2001/XMLSchema" xmlns:xsi="http://www.w3.org/2001/XMLSchema-instance">_x000D_ <Name>Tiff, 300 dpi, RGB, Transparent canvas</Name>_x000D_ <Dpi>300</Dpi>_x000D_ <FileType>Png</FileType>_x000D_ <ColorSpace>Rgb</ColorSpace>_x000D_ <Transparency>TransparentCanvas</Transparency>_x000D_ <UseColorProfile>false</UseColorPr…
	export_path	C:\Users\zach.conrad\Documents\Projects\Food Waste\Submission\PLOS One\Submission 2\S1 Fig.tif

## Sheet: S2 Table
S2 Table: Daily per capita food waste, overall and by Healthy Eating Index-2015 quintile (n=35,507)
Food or dish item				Overall (n=35,507)			HEI-2015 quintile 1 (n=6,989)			HEI-2015 quintile 5 (n=7,130)			P-trend1
				Mean (95% CI), grams
Total				421.492	(409.1-433.9)		295.298	(282.5-308.1)		534.813	(501.3-568.3)		<0.001
Meat and mixed meat dishes				56.8074	(55.0-58.6)		52.867	(48.6-57.1)		54.3283	(51.2-57.4)		0.531
	Beef			12.2855	(11.7-12.9)		11.7034	(10.6-12.8)		9.61251	(8.3-11.0)		0.003
	Pork			4.77099	(4.2-5.3)		4.6764	(3.8-5.6)		4.20413	(3.1-5.3)		0.724
	Poultry			15.0778	(13.9-16.2)		12.0166	(8.1-15.9)		16.36	(14.9-17.8)		0.01
	Seafood			8.99306	(8.1-9.9)		2.69989	(1.9-3.5)		15.3011	(13.6-17.0)		<0.001
	Meat sandwiches, burgers, sausages, and hotdogs			14.2928	(13.7-14.9)		20.6343	(19.2-22.1)		7.32751	(6.6-8.1)		<0.001
	Bacon			0.649666	(0.6-0.7)		0.822949	(0.7-1.0)		0.403959	(0.3-0.5)		<0.001
	Other			0.737525	(0.6-0.9)		0.313439	(0.2-0.5)		1.11905	(0.4-1.8)		0.02
Eggs and mixed egg dishes				2.79463	(2.6-3.0)		2.92703	(2.5-3.3)		2.12387	(1.8-2.4)		<0.001
Dairy				72.2707	(70.2-74.3)		59.9003	(56.0-63.8)		80.4762	(76.7-84.2)		<0.001
	Milk and cream			67.6587	(65.7-69.6)		54.6545	(50.9-58.5)		76.2254	(72.6-79.8)		<0.001
	Cheese			4.61206	(4.4-4.9)		5.24581	(4.6-5.9)		4.25079	(3.8-4.7)		0.004
Soup				11.842	(10.5-13.2)		8.55329	(6.3-10.8)		15.0401	(12.1-18.0)		0.001
Grains and mixed grain dishes				50.8112	(44.5-57.2)		53.3151	(47.6-59.1)		39.5643	(33.6-45.6)		0.001
	Bread			12.4532	(11.6-13.3)		12.4437	(11.7-13.2)		10.8107	(9.1-12.5)		0.074
	Breakfast cereal			3.78943	(3.6-3.9)		2.59808	(2.3-2.9)		5.3816	(9.5-15.7)		<0.001
	Pancakes, waffles, and French toast			0.968283	(0.9-1.0)		1.46589	(1.3-1.7)		0.490316	(0.4-0.6)		<0.001
	Pastas and grain mixtures			6.29265	(6.0-6.6)		6.33573	(5.7-7.0)		6.14428	(5.6-6.7)		0.603
	Pizza and calzones			5.1802	(4.8-5.5)		13.0293	(11.9-14.2)		1.14996	(0.9-1.4)		<0.001
	Grain-based desserts			22.1275	(16.2-28.1)		17.4425	(12.0-22.9)		15.5875	(10.0-21.2)		0.291
Nuts and seeds				5.7921	(2.4-9.2)		0.1384	(0.1-0.2)		17.0482	(2.3-31.8)		0.017
Fruits and vegetables and mixed dishes				163.85	(153.9-173.8)		59.0986	(51.3-66.9)		279.758	(248.0-311.5)		<0.001
	Fruit and mixed fruit dishes			80.6821	(76.0-85.4)		16.1285	(12.9-19.4)		156.792	(144.5-169.1)		<0.001
		Whole fruit		59.6933	(55.3-64.1)		10.96	(7.7-14.2)		118.439	(105.8-131.1)		<0.001
		Fruit juice2		20.9888	(19.3-22.6)		5.16848	(4.5-5.9)		38.353	(33.5-43.2)		<0.001
	Vegetables and mixed vegetable dishes			83.1682	(74.2-92.1)		42.9702	(36.9-49.1)		122.966	(92.2-153.7)		<0.001
		Dark green		3.9644	(3.4-4.5)		1.06516	(0.8-1.4)		7.70804	(6.5-8.9)		<0.001
		Yellow and orange		11.4859	(5.1-17.9)		3.12801	(1.1-5.1)		30.9995	(2.7-59.3)		0.047
		Tomatoes and tomato mixtures		3.89534	(3.6-4.1)		3.23075	(2.8-3.6)		4.39043	(3.8-5.0)		0.002
		Legumes		0.933732	(0.8-1.0)		0.173203	(0.1-0.2)		1.81702	(1.6-2.0)		<0.001
		Other		63.8225	(57.6-70.0)		35.5462	(29.7-41.4)		79.8676	(69.9-89.9)		<0.001
Potatoes and mixed potato dishes				8.62046	(8.3-9.0)		6.58879	(5.9-7.3)		7.32899	(6.7-7.9)		0.148
Table oils and salad dressing				2.22687	(2.1-2.3)		1.47498	(1.3-1.6)		2.58046	(2.3-2.8)		<0.001
Salty snacks				15.6192	(14.5-16.8)		10.4397	(8.6-12.2)		17.6765	(14.7-20.6)		<0.001
Mexican dishes				5.43265	(4.9-6.0)		6.63447	(5.5-7.8)		3.38553	(2.7-4.0)		<0.001
Other foods and dishes3				24.4908	(23.7-25.3)		33.1869	(31.8-34.5)		13.686	(12.9-14.5)		<0.001
HEI-2015, Health Eating Index-2015.
1Test for linear trend across HEI-2015 quintiles 1 through 5.
2Includes vegetable juice.
3Mostly candy, soft drinks, and other beverages.
