# Supplementary material for: Relationship between food waste, diet quality, and environmental sustainability
Source: PLoS One. 2018 Apr 18;13(4):e0195405. doi: 10.1371/journal.pone.0195405 (PMC5905889; doi:10.1371/journal.pone.0195405)
Supplement: S3 Table — (XLSX) [file pone.0195405.s004.xlsx]

## Sheet: _xltb_storage_
XL Toolbox Settings
	export_preset	<?xml version="1.0" encoding="utf-16"?>_x000D_ <Preset xmlns:xsd="http://www.w3.org/2001/XMLSchema" xmlns:xsi="http://www.w3.org/2001/XMLSchema-instance">_x000D_ <Name>Tiff, 300 dpi, RGB, Transparent canvas</Name>_x000D_ <Dpi>300</Dpi>_x000D_ <FileType>Png</FileType>_x000D_ <ColorSpace>Rgb</ColorSpace>_x000D_ <Transparency>TransparentCanvas</Transparency>_x000D_ <UseColorProfile>false</UseColorPr…
	export_path	C:\Users\zach.conrad\Documents\Projects\Food Waste\Submission\PLOS One\Submission 2\S1 Fig.tif

## Sheet: S3 Table
S3 Table: Proportion of food and dish items wasted (n=35,507)
Food or dish item				Percent (95% CI)
Total				25.4655	(25.4-25.5)
Meat and mixed meat dishes				25.5844	(25.4-25.7)
	Beef			24.022	(23.9-24.2)
	Pork			29.8642	(29.7-30.0)
	Poultry			20.4149	(20.1-20.7)
	Seafood			34.7411	(34.4-35.1)
	Meat sandwiches, burgers, sausages, and hotdogs			27.0492	(26.9-27.2)
	Bacon			22.8448	(22.1-23.6)
	Other			32.2245	(32.2-32.3)
Eggs and mixed egg dishes				25.6944	(25.6-25.8)
Dairy				24.7074	(24.6-24.8)
	Milk and cream			24.2888	(24.2-24.4)
	Cheese			26.0986	(26.0-26.2)
Soup				30.3109	(29.6-31.0)
Grains and mixed grain dishes				23.5821	(23.5-23.7)
	Bread			21.2513	(21.2-21.3)
	Breakfast cereal			24.5711	(24.4-24.7)
	Pancakes, waffles, and French toast			22.2278	(22.1-22.3)
	Pastas and grain mixtures			25.3942	(25.2-25.6)
	Pizza and calzones			25.1819	(25.0-25.4)
	Grain-based desserts			26.4408	(26.1-26.8)
Nuts and seeds				12.1537	(11.7-12.6)
Fruits and vegetables and mixed dishes				29.6289	(29.3-29.9)
	Fruit and mixed fruit dishes			27.8561	(27.5-28.3)
		Whole fruit		32.8133	(32.3-33.3)
		Fruit juice1		19.3165	(18.7-20.0)
	Vegetables and mixed vegetable dishes			31.4667	(32.0-33.6)
		Dark green		24.6174	(23.8-25.4)
		Yellow and orange		40.7925	(40.3-41.3)
		Tomatoes		17.3067	(16.9-17.7)
		Legumes		17.734	(17.3-18.1)
		Other		40.2545	(39.8-40.7)
Potatoes and mixed potato dishes				16.4322	(16.3-16.6)
Table oils and salad dressing				18.4056	(18.3-18.5)
Salty snacks				28.9254	(28.3-29.5)
Mexican dishes				23.7436	(23.5-23.9)
Other foods and dishes2				29.745	(29.6-29.9)
1Includes vegetable juice.
2Mostly candy, soft drinks, and other beverages.
