# Supplementary material for: Relationship between food waste, diet quality, and environmental sustainability
Source: PLoS One. 2018 Apr 18;13(4):e0195405. doi: 10.1371/journal.pone.0195405 (PMC5905889; doi:10.1371/journal.pone.0195405)
Supplement: S4 Table — (XLSX) [file pone.0195405.s005.xlsx]

## Sheet: _xltb_storage_
XL Toolbox Settings
	export_preset	<?xml version="1.0" encoding="utf-16"?>_x000D_ <Preset xmlns:xsd="http://www.w3.org/2001/XMLSchema" xmlns:xsi="http://www.w3.org/2001/XMLSchema-instance">_x000D_ <Name>Tiff, 300 dpi, RGB, Transparent canvas</Name>_x000D_ <Dpi>300</Dpi>_x000D_ <FileType>Png</FileType>_x000D_ <ColorSpace>Rgb</ColorSpace>_x000D_ <Transparency>TransparentCanvas</Transparency>_x000D_ <UseColorProfile>false</UseColorPr…
	export_path	C:\Users\zach.conrad\Documents\Projects\Food Waste\Submission\PLOS One\Submission 2\S1 Fig.tif

## Sheet: S4 Table
S4 Table: Nutrients embodied in food waste, per person per day (n=35,507)
Nutrient				Mean (95% CI)			Percent (95% CI)
Calories (kcal)				817.179	(795-840)		28.8057	(28.7-28.9)
Total protein (g)				29.9911	(29-31)		27.9866	(27.9-28.1)
Total carbohydrates (g)				104.586	(102-107)		29.4104	(29.2-29.6)
	Added sugars			50.1313	(49-52)		30.1452	(30.0-30.3)
	Fiber			7.37041	(7.1-7.7)		29.2308	(29.0-29.4)
Total fat (g)				30.5451	(29-32)		27.866	(27.7-28.0)
	Saturated fat			9.81026	(9.5-10.1)		27.8818	(27.7-28.0)
		4:0		0.199986	(0.19-0.21)		25.6137	(25.4-25.8)
		6:0		0.111101	(0.11-0.11)		24.9472	(24.7-25.2)
		8:0		0.0939373	(0.09-0.10)		26.1891	(26.0-26.4)
		10:0		0.174644	(0.17-0.18)		26.9515	(26.8-27.1)
		12:0		0.281631	(0.27-0.29)		27.209	(27.1-27.4)
		14:0		0.811202	(0.79-0.83)		27.6649	(27.5-27.8)
		16:0		5.34015	(5.1-5.5)		27.9566	(27.8-28.1)
		18:0		2.46303	(2.4-2.6)		27.6936	(27.6-27.8)
	Monounsaturated fat			10.6105	(10-11)		27.6039	(27.5-27.7)
		16:1n-9		0.400041	(0.39-0.41)		27.7917	(27.7-27.9)
		18:1n-9		9.89129	(9.3-10.4)		27.5692	(27.4-27.7)
		20:1n-9		0.0958617	(0.09-0.1)		27.1351	(27.0-27.3)
		22:1n-9		0.0170631	(0.02-0.02)		21.8212	(21.4-22.2)
	Polyunsaturated fat			7.32748	(6.7-8.0)		27.6219	(27.5-27.8)
		18:2n-6		6.56823	(5.9-7.2)		27.5039	(27.4-27.6)
		18:3n-3		0.599951	(0.58-0.62)		28.2148	(28.1-28.4)
		18:4n-6		0.0054753	(0.01-0.01)		12.2944	(12.0-12.6)
		20:4n-6		0.0481392	(0.04-0.05)		26.0804	(25.9-26.2)
		20:5n-3		0.0117213	(0.01-0.01)		20.7539	(20.4-21.1)
		22:5n-3		0.0069623	(0.01-0.01)		20.9657	(20.7-21.3)
		22:6n-3		0.0202612	(0.02-0.02)		20.1166	(19.8-20.4)
Cholesterol (mg)				81.4205	(79-83)		27.107	(27.0-27.3)
Vitamins
	Vitamin A (µg)1			289.112	(267-311)		29.1002	(28.9-29.3)
	Vitamin B1 (mg)			0.592557	(0.58-0.6)		28.0356	(27.9-28.2)
	Vitamin B2 (mg)			0.701985	(0.69-0.71)		28.0316	(27.9-28.2)
	Niacin (mg)			9.15324	(9.0-9.3)		28.1703	(28.0-28.3)
	Vitamin B6 (mg)			0.750208	(0.74-0.76)		28.5665	(28.4-28.7)
	Folate (µg)2			198.797	(195-203)		28.2014	(28.0-28.4)
	Choline (mg)			117.023	(114-120)		28.8472	(28.7-29.0)
	Vitamin B12 (µg)			1.79444	(1.7-1.8)		27.341	(27.2-27.5)
	Vitamin C (mg)			39.894	(38-42)		28.8316	(28.5-29.1)
	Vitamin D (µg)			1.62276	(1.6-1.7)		25.4279	(25.3-25.6)
	Vitamin K (µg)			42.6008	(39-46)		28.5192	(28.3-28.7)
	Vitamin E (mg)			2.89729	(2.8-3.0)		27.9318	(27.8-28.1)
Minerals
	Calcium (mg)			323.663	(318-329)		27.4998	(27.4-27.6)
	Phosphorous (mg)			547.481	(509-586)		28.2755	(28.1-28.4)
	Magnesium (mg)			129.293	(111-148)		28.7485	(28.6-28.9)
	Iron (mg)			5.74293	(5.5-6.0)		27.8376	(27.7-28.0)
	Zinc (mg)			4.56385	(4.3-4.8)		28.388	(28.3-28.5)
	Copper (mg)			0.492843	(0.45-0.54)		28.7307	(28.6-28.9)
	Sodium (mg)			1326.38	(1301-1352)		28.9449	(28.8-29.1)
	Potassium (mg)			1061.64	(1025-1098)		29.2657	(29.1-29.5)
	Selenium (µg)			38.4149	(38-39)		27.428	(27.3-27.5)
Total carotenoids (µg)				5095.2	(4721-5470)		30.9527	(30.7-31.2)
	α-carotene			302.879	(245-361)		25.737	(25.4-26.1)
	β-carotene			1467.78	(1286-1649)		31.1774	(30.9-31.5)
	β-cryptoxanthin			129.912	(42-218)		27.8713	(27.5-28.2)
	Lycopene			2404.66	(2304-2505)		20.3469	(20.0-20.7)
	Lutein and zeaxanthin			789.965	(706-874)		29.8063	(29.5-30.1)
1Retinol activity equivalent (RAE).
2Dietary folate equivalent (DFE).
