# Supplementary material for: Relationship between food waste, diet quality, and environmental sustainability
Source: PLoS One. 2018 Apr 18;13(4):e0195405. doi: 10.1371/journal.pone.0195405 (PMC5905889; doi:10.1371/journal.pone.0195405)
Supplement: S5 Table — (XLSX) [file pone.0195405.s006.xlsx]

## Sheet: _xltb_storage_
XL Toolbox Settings
	export_preset	<?xml version="1.0" encoding="utf-16"?>_x000D_ <Preset xmlns:xsd="http://www.w3.org/2001/XMLSchema" xmlns:xsi="http://www.w3.org/2001/XMLSchema-instance">_x000D_ <Name>Tiff, 300 dpi, RGB, Transparent canvas</Name>_x000D_ <Dpi>300</Dpi>_x000D_ <FileType>Png</FileType>_x000D_ <ColorSpace>Rgb</ColorSpace>_x000D_ <Transparency>TransparentCanvas</Transparency>_x000D_ <UseColorProfile>false</UseColorPr…
	export_path	C:\Users\zach.conrad\Documents\Projects\Food Waste\Submission\PLOS One\Submission 2\S1 Fig.tif

## Sheet: S5 Table
S5 Table Annual amount of irrigation water used to produce wasted food, overall and by Healthy Eating Index-2015 quintile (n=35,507)
Land use category				Overall (n=35,507)			HEI-2015 quintile 1 (n=6,989)			HEI-2015 quintile 5 (n=7,130)			P-trend1
				Mean (95% CI), billion gallons
All cropland				4193.02	(4,091-4,293)		601.354	(579-624)		1044.04	(1,015-1,071)		0.001
Grains				267.181	(264-271)		59.3869	(58-61)		46.3987	(45-48)		0.004
Fruits				1291.27	(1,230-1,352)		57.4187	(49-66)		492.037	(460-524)		0.001
Vegetables				1049.9	(989-1,111)		122.815	(111-135)		270.879	(240-301)		0.01
Legumes				7.48583	(7.1-7.8)		0.737685	(0.7-0.8)		2.79691	(2.5-3.0)		0.032
Nuts				32.2169	(30-34)		1.33049	(1.1-1.6)		16.1602	(4.9-18)		0.033
Sweeteners				197.236	(193-202)		52.9218	(51-54)		24.6777	(24-25)		<0.001
Feed grains and oilseeds				316.326	(309-323)		60.9721	(59-63)		56.0968	(54-58)		0.452
Hay				1011.3	(980-1,043)		238.621	(228-249)		134.993	(127-143)		0.017
Cropland pasture				20.1041	(18-22)		7.1507	(6.4-7.8)		0.00539074	(0-0)		0.053
HEI-2015, Health Eating Index-2015.
1Test for linear trend across HEI-2015 quintiles 1 through 5.
