# Supplementary material for: Relationship between food waste, diet quality, and environmental sustainability
Source: PLoS One. 2018 Apr 18;13(4):e0195405. doi: 10.1371/journal.pone.0195405 (PMC5905889; doi:10.1371/journal.pone.0195405)
Supplement: S6 Table — (XLSX) [file pone.0195405.s007.xlsx]

## Sheet: _xltb_storage_
XL Toolbox Settings
	export_preset	<?xml version="1.0" encoding="utf-16"?>_x000D_ <Preset xmlns:xsd="http://www.w3.org/2001/XMLSchema" xmlns:xsi="http://www.w3.org/2001/XMLSchema-instance">_x000D_ <Name>Tiff, 300 dpi, RGB, Transparent canvas</Name>_x000D_ <Dpi>300</Dpi>_x000D_ <FileType>Png</FileType>_x000D_ <ColorSpace>Rgb</ColorSpace>_x000D_ <Transparency>TransparentCanvas</Transparency>_x000D_ <UseColorProfile>false</UseColorPr…
	export_path	C:\Users\zach.conrad\Documents\Projects\Food Waste\Submission\PLOS One\Submission 2\S1 Fig.tif

## Sheet: S6 Table
S6 Table: Annual amount of pesticides used to produce wasted food, overall and by Healthy Eating Index-2015 quintile (n=35,507)
Land use category				Overall (n=35,507)			HEI-2015 quintile 1 (n=6,989)			HEI-2015 quintile 5 (n=7,130)			P-trend1
				Mean (95% CI), million pounds
All cropland				778.195	(759-797)		97.1911	(94-101)		213.094	(207-219)		<0.001
Grains				25.8543	(26-26)		5.7467	(5.6-5.9)		4.48987	(4.4-4.6)		0.004
Fruits				337.109	(321-353)		14.9901	(13-17)		128.455	(120-137)		0.001
Vegetables				133.156	(125-141)		15.5763	(14-17)		34.3549	(30-38)		<0.010
Legumes				1.52436	(1.45-1.59)		0.150216	(0.1-0.2)		0.569541	(0.5-0.6)		0.032
Nuts				3.7253	(3.5-4)		0.153847	(0.1-0.2)		1.86864	(1.7-2)		0.042
Sweeteners				64.9111	(64-66)		17.4168	(17-18)		8.12152	(7.9-8.4)		<0.001
Feed grains and oilseeds				158.434	(155-162)		30.5382	(29-32)		28.0964	(27-29)		0.452
Hay				53.4805	(52-55)		12.6189	(12-13)		7.13881	(7-8)		0.017
Cropland pasture				0	(0-0)		0	(0-0)		0	(0-0)		NA
HEI-2015, Health Eating Index-2015.
1Test for linear trend across HEI-2015 quintiles 1 through 5.
