# Supplementary material for: Relationship between food waste, diet quality, and environmental sustainability
Source: PLoS One. 2018 Apr 18;13(4):e0195405. doi: 10.1371/journal.pone.0195405 (PMC5905889; doi:10.1371/journal.pone.0195405)
Supplement: S7 Table — (XLSX) [file pone.0195405.s008.xlsx]

## Sheet: _xltb_storage_
XL Toolbox Settings
	export_preset	<?xml version="1.0" encoding="utf-16"?>_x000D_ <Preset xmlns:xsd="http://www.w3.org/2001/XMLSchema" xmlns:xsi="http://www.w3.org/2001/XMLSchema-instance">_x000D_ <Name>Emf</Name>_x000D_ <Dpi>300</Dpi>_x000D_ <FileType>Emf</FileType>_x000D_ <ColorSpace>Rgb</ColorSpace>_x000D_ <Transparency>TransparentCanvas</Transparency>_x000D_ <UseColorProfile>false</UseColorProfile>_x000D_ <ColorProfile>ProPhot…
	export_path	C:\Users\zach.conrad\Documents\Projects\Food Waste\Submission\PLOS One\Submission 2\Figure 2.emf

## Sheet: S7 Table
S7 Table: Annual amount of nitrogen fertilizer used to produce wasted food, overall and by Healthy Eating Index-2015 quintile (n=35,507)
Land use category				Overall (n=35,507)			HEI-2015 quintile 1 (n=6,989)			HEI-2015 quintile 5 (n=7,130)			P-trend1
				Mean (95% CI), million pounds
All cropland				1842.95	(1,798-1,887)		339.949	(327-353)		366.92	(357-376)		0.752
Grains				255.646	(252-259)		56.823	(56-58)		44.3956	(43-46)		0.004
Fruits				168.879	(161-177)		7.50951	(6.4-8.6)		64.351	(60-68)		0.001
Vegetables				388.722	(366-411)		45.4718	(41-50)		100.292	(89-111)		0.01
Legumes				4.50035	(4.3-4.7)		0.443483	(0.4-0.5)		1.68145	(1.5-1.8)		0.032
Nuts				5.68257	(5.3-6.1)		0.234677	(0.2-0.3)		2.85041	(2.6-3.1)		0.042
Sweeteners				244.97	(240-250)		65.7298	(64-68)		30.6501	(30-32)		<0.001
Feed grains and oilseeds				440.298	(431-450)		84.8678	(82-88)		78.0818	(76-81)		0.452
Hay				334.253	(324-345)		78.8684	(75-82)		44.6176	(42-47)		0.017
Cropland pasture				0	(0-0)		0	(0-0)		0	(0-0)		NA
HEI-2015, Health Eating Index-2015.
1Test for linear trend across HEI-2015 quintiles 1 through 5.
