# Supplementary material for: Relationship between food waste, diet quality, and environmental sustainability
Source: PLoS One. 2018 Apr 18;13(4):e0195405. doi: 10.1371/journal.pone.0195405 (PMC5905889; doi:10.1371/journal.pone.0195405)
Supplement: S8 Table — (XLSX) [file pone.0195405.s009.xlsx]

## Sheet: _xltb_storage_
XL Toolbox Settings
	export_preset	<?xml version="1.0" encoding="utf-16"?>_x000D_ <Preset xmlns:xsd="http://www.w3.org/2001/XMLSchema" xmlns:xsi="http://www.w3.org/2001/XMLSchema-instance">_x000D_ <Name>Emf</Name>_x000D_ <Dpi>300</Dpi>_x000D_ <FileType>Emf</FileType>_x000D_ <ColorSpace>Rgb</ColorSpace>_x000D_ <Transparency>TransparentCanvas</Transparency>_x000D_ <UseColorProfile>false</UseColorProfile>_x000D_ <ColorProfile>ProPhot…
	export_path	C:\Users\zach.conrad\Documents\Projects\Food Waste\Submission\PLOS One\Submission 2\Figure 2.emf

## Sheet: S8 Table
S8 Table: Annual amount of phosphorus (P2O5) fertilizer used to produce wasted food, overall and by Healthy Eating Index-2015 quintile (n=35,507)
Land use category				Overall (n=35,507)			HEI-2015 quintile 1 (n=6,989)			HEI-2015 quintile 5 (n=7,130)			P-trend1
				Mean (95% CI), million pounds
All cropland				1488.59	(1,387-1,456)		282.636	(272-293)		281.851	(274-289)		0.978
Grains				114.683	(113-116)		25.4909	(25-26)		19.9159	(19-21)		0.004
Fruits				103.105	(98-108)		4.58474	(3.9-5.3)		39.2879	(37-42)		0.001
Vegetables				266.073	(251-281)		31.1247	(28-34)		68.6483	(61-76)		0.01
Legumes				3.567	(3.4-3.7)		0.351507	(0.3-0.4)		1.33273	(1.2-1.4)		0.032
Nuts				4.9997	(4.7-5.3)		0.206476	(0.2-0.2)		2.50788	(2.3-2.7)		0.042
Sweeteners				114.465	(112-117)		30.713	(30-32)		14.3216	(14-15)		<0.001
Feed grains and oilseeds				413.743	(405-423)		79.7493	(77-83)		73.3725	(71-76)		0.452
Hay				467.955	(454-482)		110.416	(106-115)		62.4646	(59-66)		0.017
Cropland pasture				0	(0-0)		0	(0-0)		0	(0-0)		NA
HEI-2015, Health Eating Index-2015.
1Test for linear trend across HEI-2015 quintiles 1 through 5.
