# Supplementary material for: Relationship between food waste, diet quality, and environmental sustainability
Source: PLoS One. 2018 Apr 18;13(4):e0195405. doi: 10.1371/journal.pone.0195405 (PMC5905889; doi:10.1371/journal.pone.0195405)
Supplement: S9 Table — (XLSX) [file pone.0195405.s010.xlsx]

## Sheet: _xltb_storage_
XL Toolbox Settings
	export_preset	<?xml version="1.0" encoding="utf-16"?>_x000D_ <Preset xmlns:xsd="http://www.w3.org/2001/XMLSchema" xmlns:xsi="http://www.w3.org/2001/XMLSchema-instance">_x000D_ <Name>Emf</Name>_x000D_ <Dpi>300</Dpi>_x000D_ <FileType>Emf</FileType>_x000D_ <ColorSpace>Rgb</ColorSpace>_x000D_ <Transparency>TransparentCanvas</Transparency>_x000D_ <UseColorProfile>false</UseColorProfile>_x000D_ <ColorProfile>ProPhot…
	export_path	C:\Users\zach.conrad\Documents\Projects\Food Waste\Submission\PLOS One\Submission 2\Figure 2.emf

## Sheet: S9 Table
S9 Table: Annual amount of potash (K2O) fertilizer used to produce wasted food, overall and by Healthy Eating Index-2015 quintile (n=35,507)
Land use category				Overall (n=35,507)			HEI-2015 quintile 1 (n=6,989)			HEI-2015 quintile 5 (n=7,130)			P-trend1
				Mean (95% CI), million pounds
All cropland				2283.23	(2,228-2,338)		448.963	(432-466)		413.602	(402-424)		0.279
Grains				104.111	(103-105)		23.1409	(23-24)		18.0799	(18-19)		0.004
Fruits				159.558	(152-167)		7.09504	(6-8)		60.7993	(57-65)		0.001
Vegetables				271.323	(256-287)		31.7387	(29-35)		70.0026	(62-78)		0.01
Legumes				4.89106	(5-5)		0.481985	(0-1)		1.82743	(2-2)		0.032
Nuts				7.80295	(7-8)		0.322244	(0-0)		3.91401	(4-4)		0.042
Sweeteners				148.517	(145-152)		39.8497	(39-41)		18.5821	(18-19)		<0.001
Feed grains and oilseeds				651.116	(637-665)		125.503	(121-130)		115.468	(112-120)		0.452
Hay				935.909	(907-965)		220.831	(211-231)		124.929	(118-132)		0.017
Cropland pasture				0	(0-0)		0	(0-0)		0	(0-0)		NA
HEI-2015, Health Eating Index-2015.
1Test for linear trend across HEI-2015 quintiles 1 through 5.
