# Supplementary material for: Relationship between food waste, diet quality, and environmental sustainability
Source: PLoS One. 2018 Apr 18;13(4):e0195405. doi: 10.1371/journal.pone.0195405 (PMC5905889; doi:10.1371/journal.pone.0195405)
Supplement: S10 Table — (XLSX) [file pone.0195405.s011.xlsx]

## Sheet: _xltb_storage_
XL Toolbox Settings
	export_preset	<?xml version="1.0" encoding="utf-16"?>_x000D_ <Preset xmlns:xsd="http://www.w3.org/2001/XMLSchema" xmlns:xsi="http://www.w3.org/2001/XMLSchema-instance">_x000D_ <Name>Emf</Name>_x000D_ <Dpi>300</Dpi>_x000D_ <FileType>Emf</FileType>_x000D_ <ColorSpace>Rgb</ColorSpace>_x000D_ <Transparency>TransparentCanvas</Transparency>_x000D_ <UseColorProfile>false</UseColorProfile>_x000D_ <ColorProfile>ProPhot…
	export_path	C:\Users\zach.conrad\Documents\Projects\Food Waste\Submission\PLOS One\Submission 2\Figure 2.emf

## Sheet: S10 Table
S10 Table: Healthy Eating Index-2015 component scores, National Health and Nutrition Examination Survey, 2007-2014 (n=35,507)
							HEI-2010 quintile
Component		Maximum score		Overall (n=35,507)			Quintile 1 (n=6,989)		Quintile 2 (n=7,130)		Quintile 3 (n=7,129)		Quintile 4 (n=7,129)		Quintile 5 (n=7,130)
				Mean (95% CI)
Total HEI		100		58.43	(57.50-59.29)		31.80 (31.44-32.14)		44.90 (44.61-45.19)		56.13 (55.70-56.55)		66.89 (66.55-67.22)		81.82 (81.20-82.45)
Total fruit1		5		3.03	(2.91-3.15)		0.72 (0.66-0.78)		1.70 (1.59-1.82)		2.85 (2.68-3.03)		4.00 (3.80-4.19)		5.00 (5.00-5.00)
Whole fruit2		5		4.13	(3.95-4.32)		0.74 (0.64-0.84)		2.04 (1.83-2.26)		3.61 (3.31-3.91)		5.00 (5.00-5.00)		5.00 (5.00-5.00)
Total vegetables		5		3.26	(3.18-3.34)		2.04 (1.96-2.13)		2.67 (2.58-2.77)		3.24 (3.13-3.34)		3.77 (3.64-3.90)		4.71 (4.52-4.90)
Greens and beans3		5		2.74	(2.58-2.90)		0.52 (0.43-0.61)		1.31 (1.15-1.46)		2.07 (1.89-2.25)		3.56 (3.32-3.79)		5.00 (5.00-5.00)
Whole grains		10		2.48	(2.36-2.60)		0.67 (0.62-0.72)		1.27 (1.16-1.37)		2.03 (1.90-2.16)		3.01 (2.85-3.16)		5.60 (5.35-5.86)
Dairy4		10		6.53	(6.40-6.66)		6.99 (6.71-7.27)		6.34 (6.11-6.57)		6.60 (6.37-6.83)		6.13 (5.93-6.34)		6.57 (6.31-6.84)
Total protein foods		5		5	(5.00-5.00)		4.67 (4.51-4.83)		5.00 (5.00-5.00)		5.00 (5.00-5.00)		5.00 (5.00-5.00)		5.00 (5.00-5.00)
Seafood and plant proteins		5		4.92	(4.70-5.00)		1.04 (0.92-1.16)		2.46 (2.27-2.65)		4.23 (3.89-4.59)		5.00 (5.00-5.00)		5.00 (5.00-5.00)
Fatty acids5		10		4.13	(4.01-4.26)		1.47 (1.34-1.60)		3.13 (2.96-3.30)		4.21 (4.01-4.41)		5.61 (5.36-5.85)		8.09 (7.74-8.44)
Refined grains6		10		6.13	(5.99-6.26)		2.99 (2.75-3.22)		5.16 (4.88-5.42)		6.26 (5.98-6.55)		7.23 (6.97-7.48)		9.27 (9.09-9.44)
Sodium6		10		4.02	(3.89-4.16)		2.78 (2.58-2.98)		3.94 (3.69-4.18)		4.01 (3.76-4.27)		4.30 (4.03-4.56)		5.18 (4.87-5.47)
Added sugars6		10		6.16	(5.97-6.35)		4.13 (3.89-4.37)		4.97 (4.66-5.28)		6.12 (5.91-6.34)		7.14 (6.95-7.34)		8.67 (8.53-8.80)
Saturated fats6		10		5.89	(5.77-6.01)		3.04 (2.85-3.23)		4.92 (4.68-5.15)		5.89 (5.67-6.10)		7.14 (6.91-7.36)		8.74 (8.57-8.92)
All component scores adjusted for energy using the density method (per 1,000 kcal)
Sample sizes are unweighted
1Includes fruit juice
2Includes all forms except juice
3Includes beans and peas not counted as protein foods
4Includes milk substitutes
5Ratio of unsaturated fatty acids to saturated fatty acids
6Reverse scored so that higher number represents lower consumption
