# Supplementary material for: Relationship between food waste, diet quality, and environmental sustainability
Source: PLoS One. 2018 Apr 18;13(4):e0195405. doi: 10.1371/journal.pone.0195405 (PMC5905889; doi:10.1371/journal.pone.0195405)
Supplement: S11 Table — (XLSX) [file pone.0195405.s012.xlsx]

## Sheet: _xltb_storage_
XL Toolbox Settings
	export_preset	<?xml version="1.0" encoding="utf-16"?>_x000D_ <Preset xmlns:xsd="http://www.w3.org/2001/XMLSchema" xmlns:xsi="http://www.w3.org/2001/XMLSchema-instance">_x000D_ <Name>Emf</Name>_x000D_ <Dpi>300</Dpi>_x000D_ <FileType>Emf</FileType>_x000D_ <ColorSpace>Rgb</ColorSpace>_x000D_ <Transparency>TransparentCanvas</Transparency>_x000D_ <UseColorProfile>false</UseColorProfile>_x000D_ <ColorProfile>ProPhot…
	export_path	C:\Users\zach.conrad\Documents\Projects\Food Waste\Submission\PLOS One\Submission 2\Figure 2.emf

## Sheet: S11 Table
S11 Table: Annual cropland used to produce wasted food, overall and by Healthy Eating Index-2015 quintile (n=35,507)
Land use category				Overall (n=35,507)			HEI-2015 quintile 1 (n=6,989)			HEI-2015 quintile 5 (n=7,130)			P-trend1
				Mean (95% CI), million acres
All cropland				30.0177	(29.29-30.74)		6.53932	(6.29-6.78)		4.78414	(4.65-4.91)		0.029
Grains				3.38301	(3.34-3.43)		0.75195	(0.73-0.77)		0.587495	(0.57-0.60)		0.004
Fruits				2.01876	(1.92-2.11)		0.0897676	(0.08-0.100)		0.769243	(0.72-0.82)		0.001
Vegetables				2.22308	(2.09-2.35)		0.260051	(0.23-0.29)		0.573567	(0.51-0.64)		0.01
Legumes				0.0578824	(0.06-0.06)		0.00570396	(0.01-0.01)		0.0216264	(0.02-0.02)		0.032
Nuts				0.0838454	(0.08-0.09)		<0.01	(0.00-<0.01)		0.0420574	(0.04-0.05)		0.042
Sweeteners				1.83532	(1.8-1.88)		0.492449	(0.48-0.51)		0.229631	(0.22-0.24)		<0.001
Feed grains and oilseeds				7.72365	(7.56-7.89)		1.48874	(1.43-1.54)		1.3697	(1.32-1.42)		0.452
Hay				8.91342	(8.64-9.19)		2.10316	(2.01-2.20)		1.1898	(1.12-1.26)		0.017
Cropland pasture				3.77874	(3.38-4.17)		1.34404	(1.21-1.47)		<0.01	(0.00-<0.01)		0.053
HEI-2015, Health Eating Index-2015.
1Test for linear trend across HEI-2015 quintiles 1 through 5.
